**B**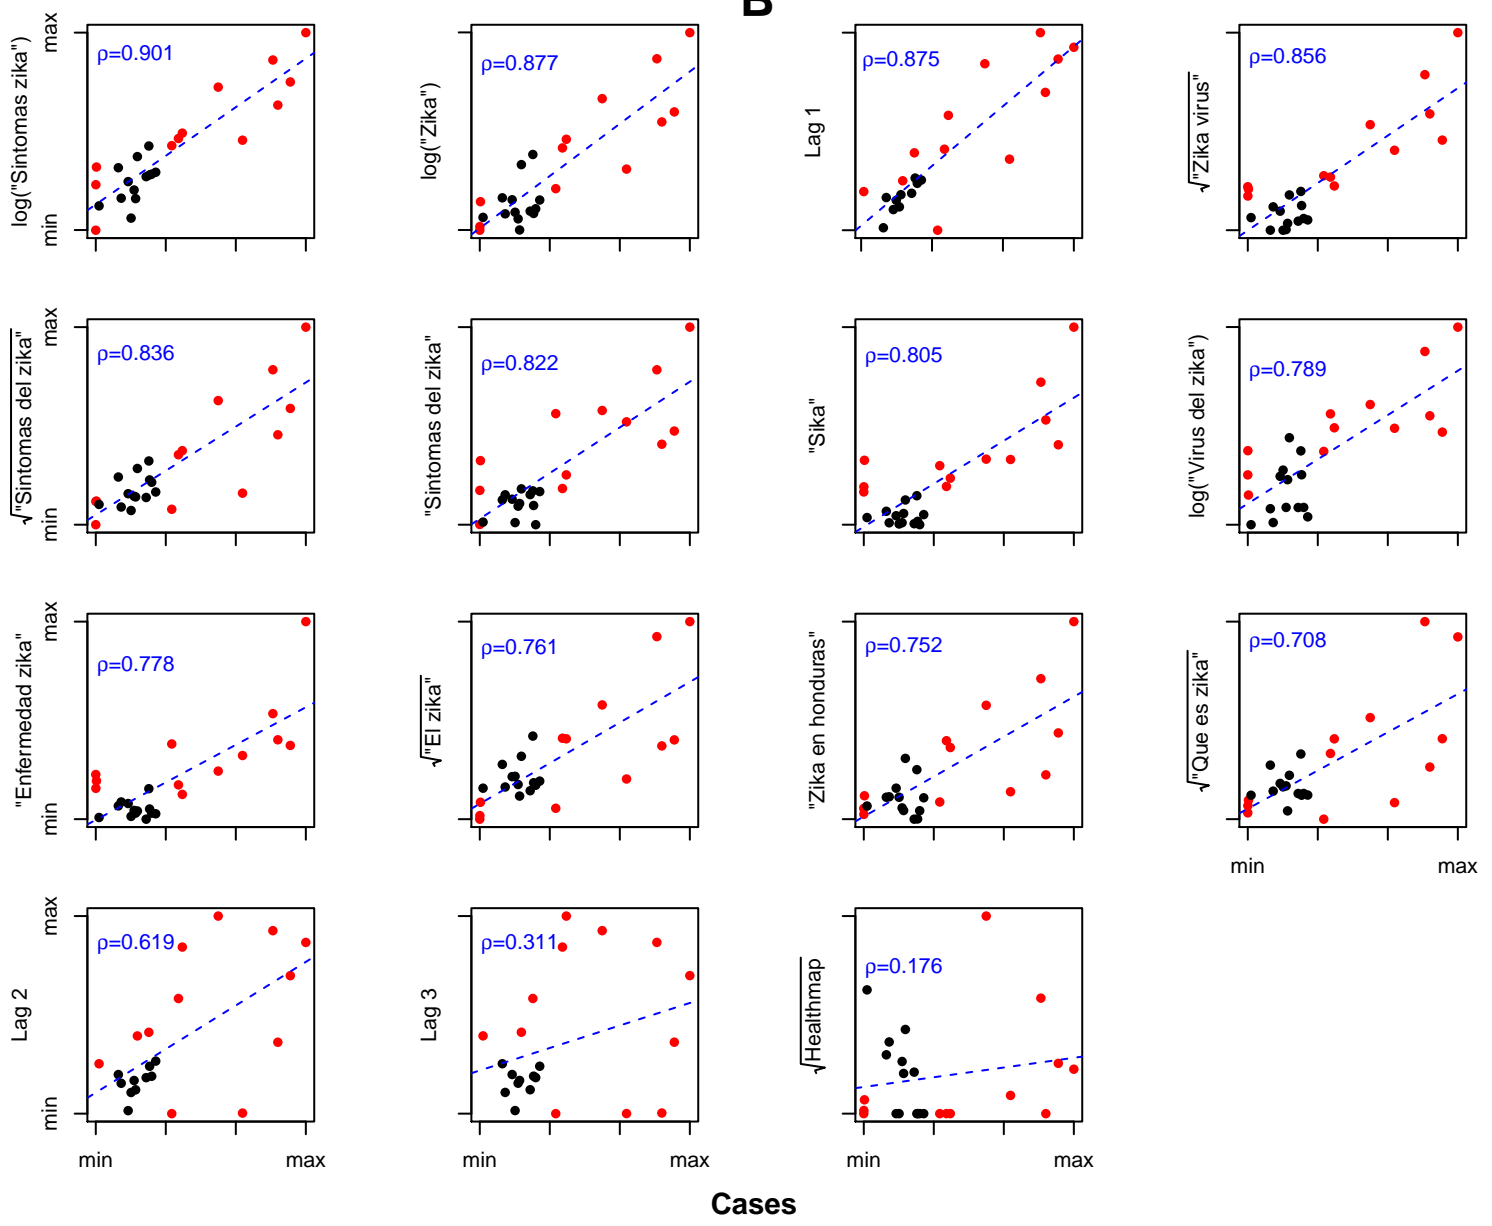**Cases**

C

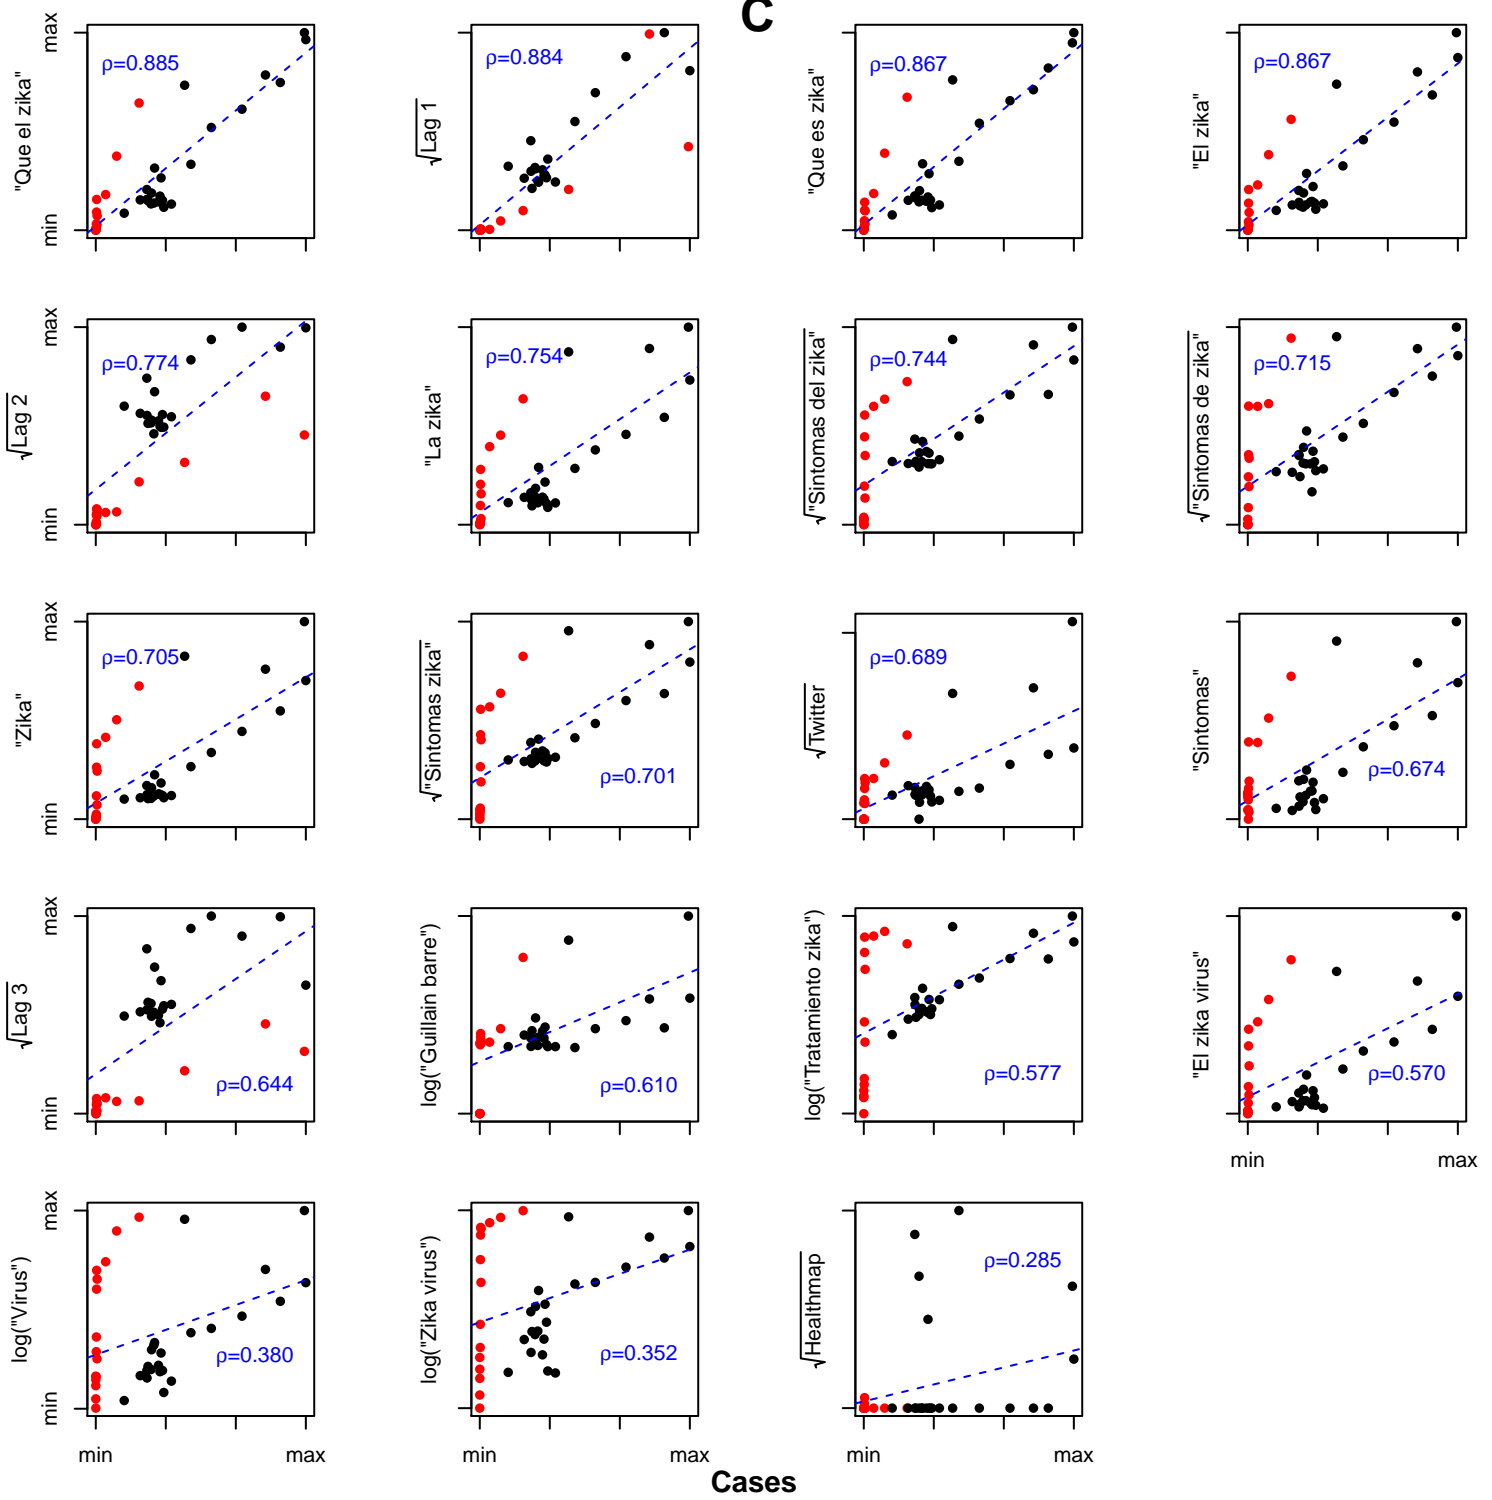

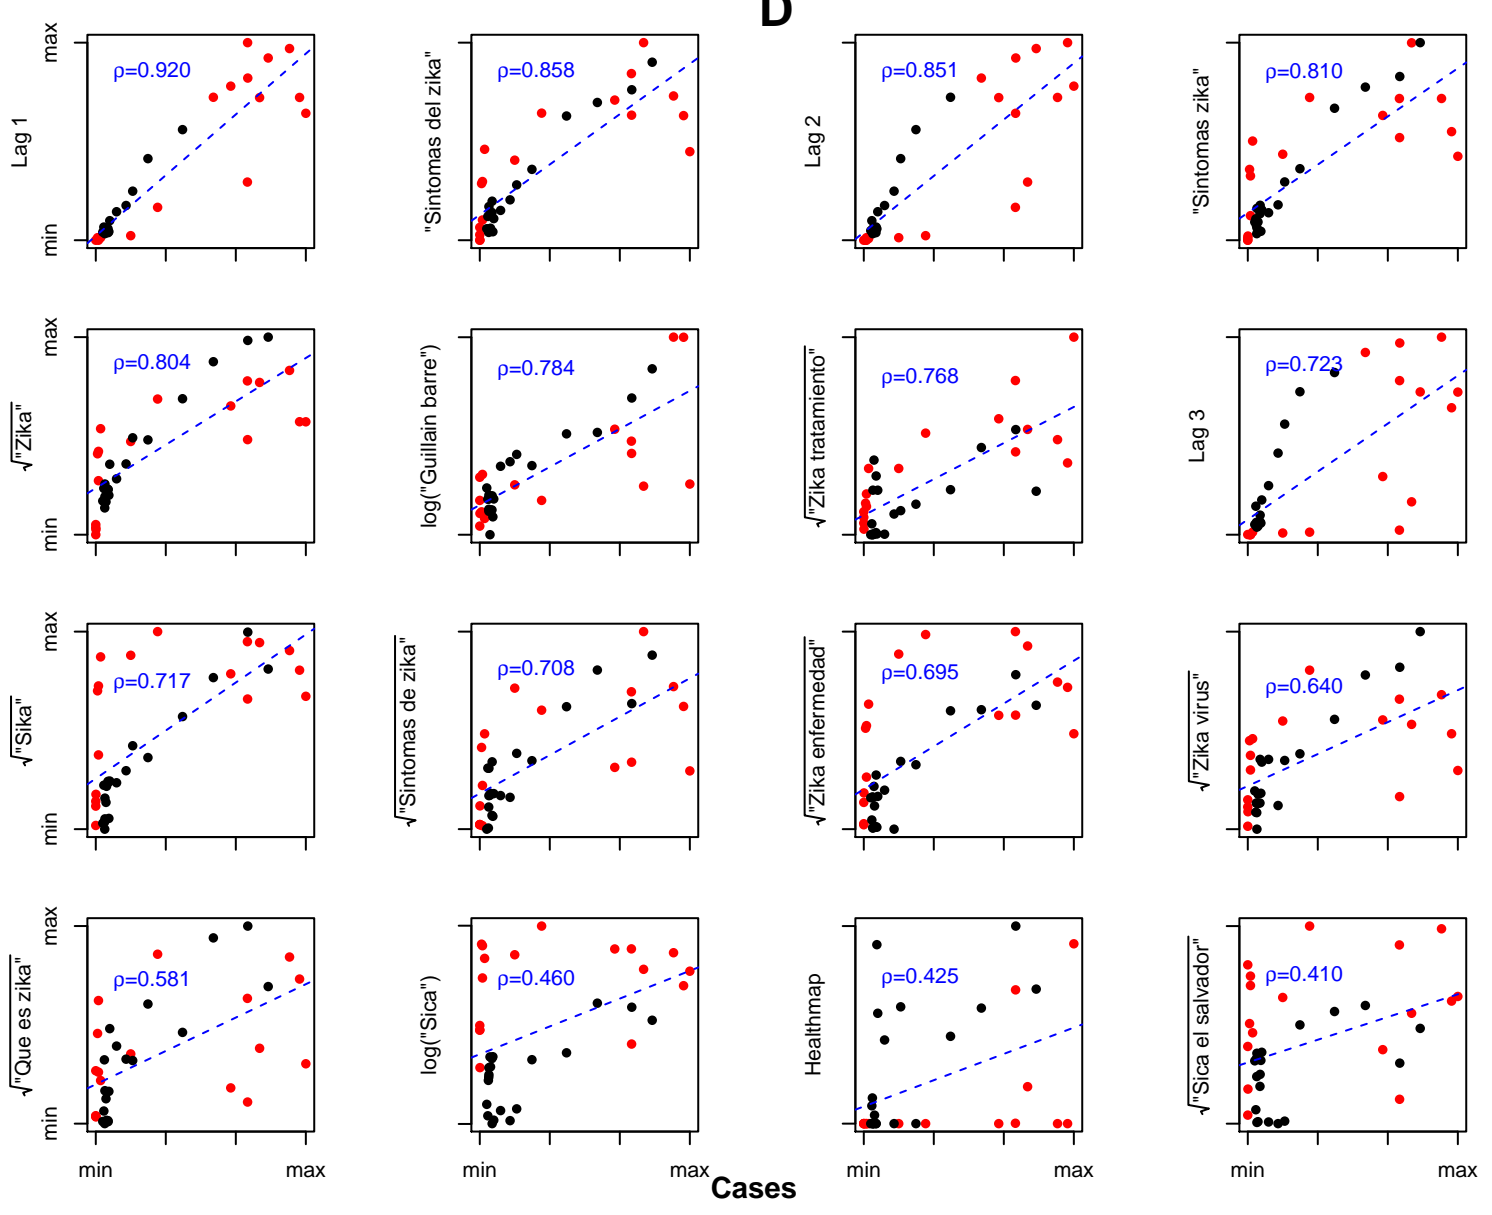

Cases

**E**

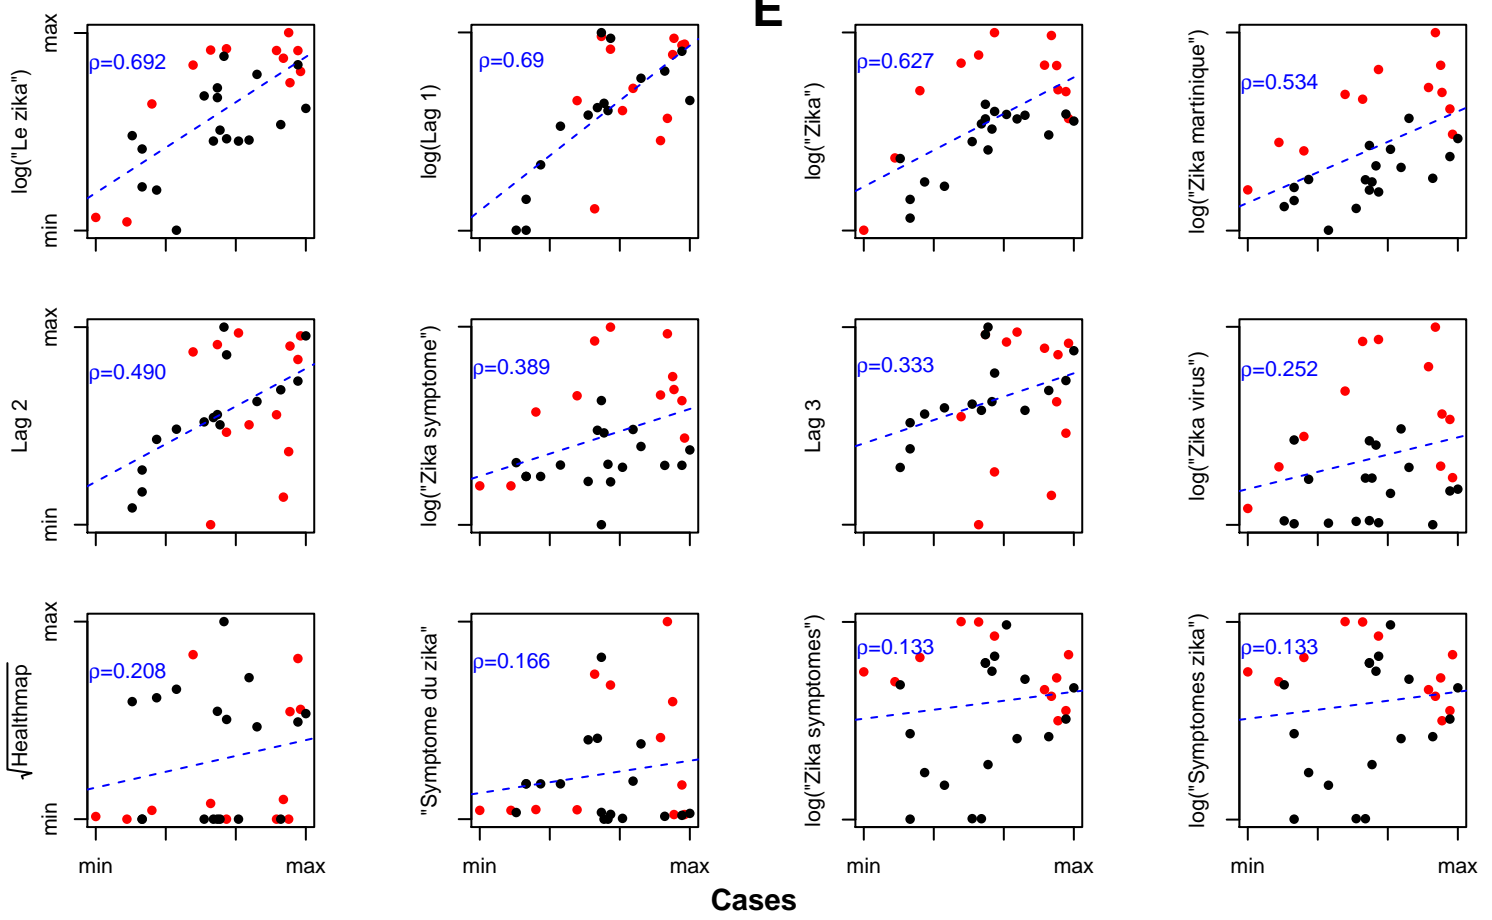

Source: https://storage.googleapis.com/plos-corpus-prod/10.1371/journal.pntd.0005295/2/pntd.0005295.s004.pdf
